# Supplementary material for: A facile approach to nanoarchitectured three-dimensional graphene-based Li–Mn–O composite as high-power cathodes for Li-ion batteries
Source: PubMed Central journal article supplement (PMC3458596; doi:10.3762/bjnano.3.59), 2012-07-17
Supplement: Beilstein_J_Nanotechnol-03-513-s001.pdf [file Beilstein_J_Nanotechnol-03-513-s001.pdf]

## Supporting Information

for

# **A facile approach to nanoarchitected three-dimensional graphene-based Li–Mn–O composite as high-power cathodes for Li-ion batteries**

Wenyu Zhang<sup>1,2</sup>, Yi Zeng<sup>1</sup>, Chen Xu<sup>1,3</sup>, Ni Xiao<sup>1</sup>, Yiben Gao<sup>4</sup>, Lain-Jong Li<sup>5</sup>, Xiaodong Chen<sup>1</sup>, Huey Hoon Hng<sup>1</sup> and Qingyu Yan<sup>\*1,2,3</sup>

Address: <sup>1</sup>School of Materials Science and Engineering, Nanyang Technological University, Singapore 639798, Singapore, <sup>2</sup>TUM CREATE Research Centre @ NTU, Nanyang Technological University, Singapore 637459, Singapore, <sup>3</sup>Energy Research Institute @ NTU, Nanyang Technological University, Singapore 637553, Singapore, <sup>4</sup>School of Civil and Environmental Engineering, Nanyang Technological University, Singapore 639798, Singapore and <sup>5</sup>Research Center for Applied Sciences, Academia Sinica, Taipei 11529, Taiwan

Email: Qingyu Yan - alexyan@ntu.edu.sg

\* Corresponding author

Additional figures

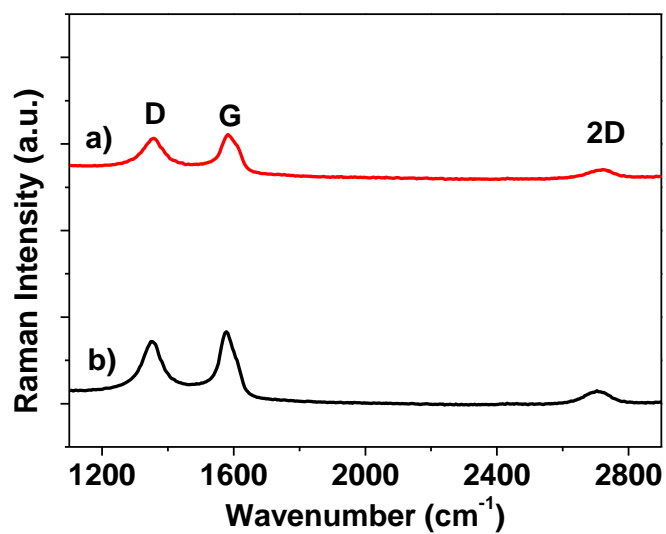

**Figure S1:** Raman spectra for (a) Mn<sub>2</sub>O<sub>3</sub>/graphene prepared with 0.15 M MnSO<sub>4</sub> in the electrochemical process and (b) LiMn<sub>2</sub>O<sub>4</sub>/graphene prepared by lithiating Mn<sub>2</sub>O<sub>3</sub>/graphene with I<sub>MO:G</sub> = 0.99 by molten salt reaction. The D, G and 2D bands are indicated.

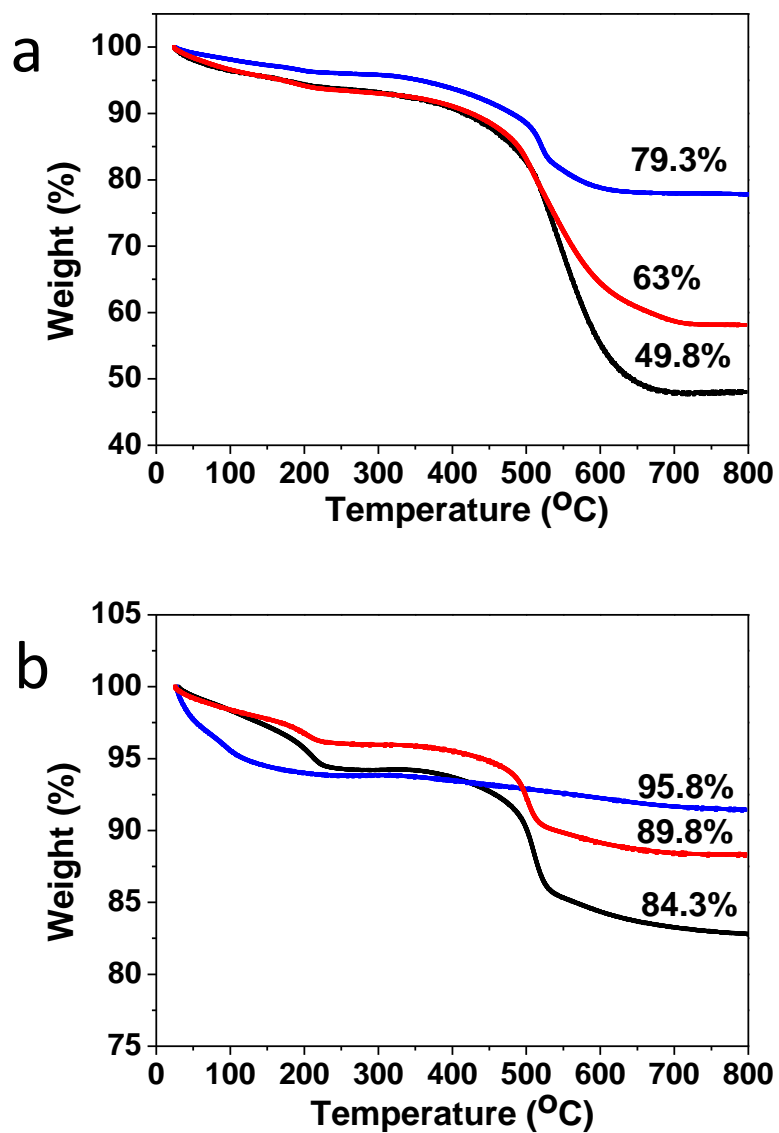

**Figure S2:** Thermogravimetric analyses of (a)  $\text{Mn}_2\text{O}_3/\text{graphene}$  and (b)  $\text{LiMn}_2\text{O}_4/\text{graphene}$  with various  $I_{\text{LMO:G}}$  values.

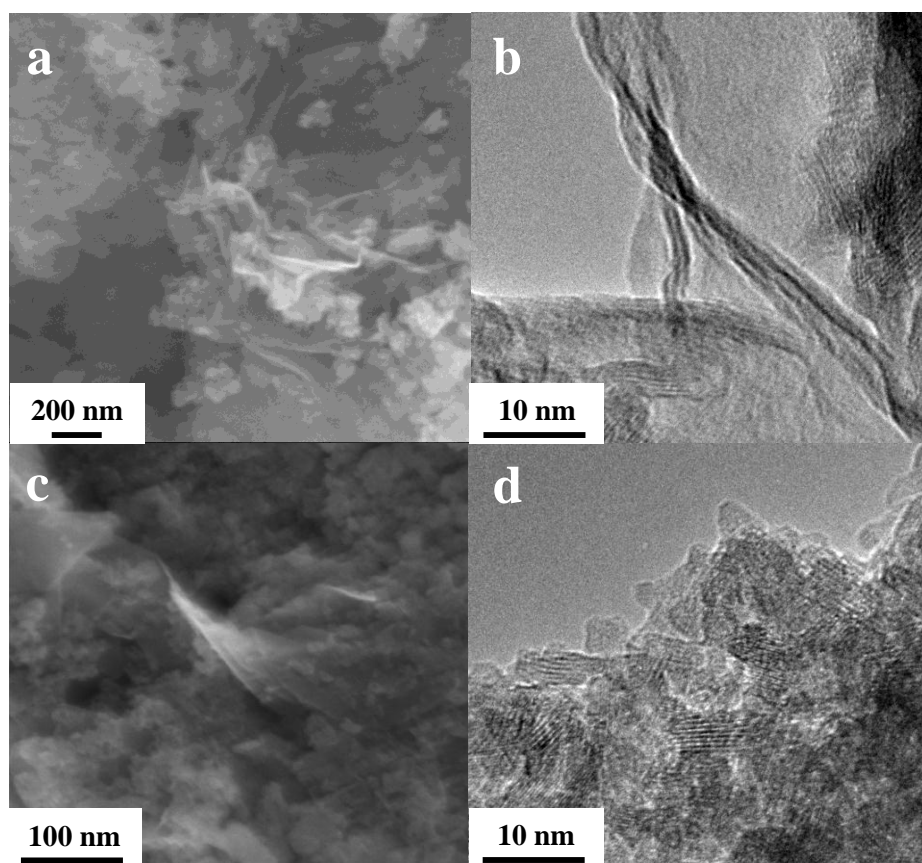

**Figure S3:** (a, c) SEM and (b, d) HRTEM images of LiMn<sub>2</sub>O<sub>4</sub>/graphene with (a, b)  $I_{\text{LMO:G}} = 8.80$  and (c, d)  $I_{\text{LMO:G}} = 22.81$ .

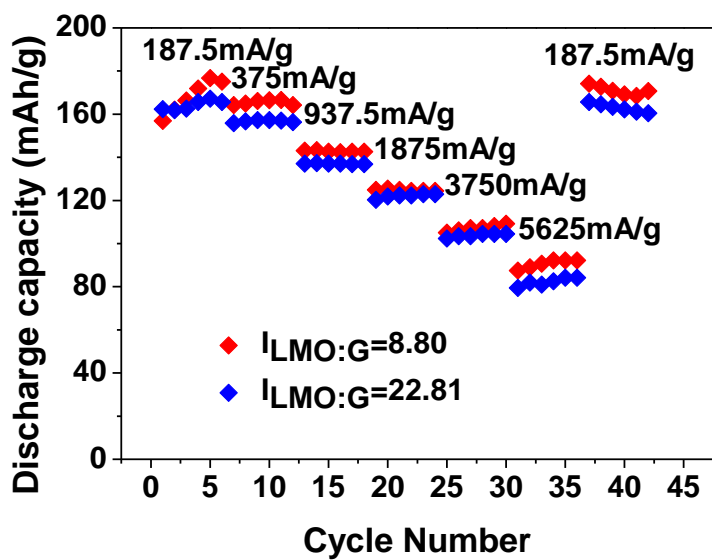

**Figure S4:** Rate performance of  $\text{LiMn}_2\text{O}_4/\text{graphene}$  with  $I_{LMO:G} = 8.80$  and  $22.81$  between 2 and 4.5 V.

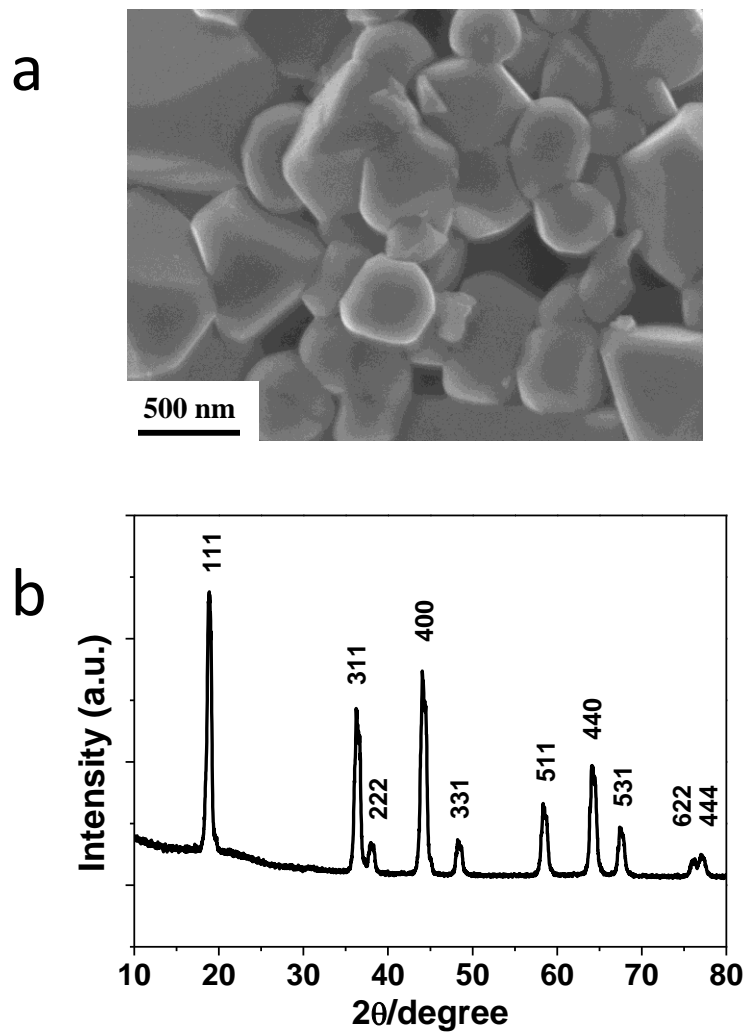

**Figure S5:** (a) SEM image and (b) XRD pattern of commercial  $\text{LiMn}_2\text{O}_4$ .

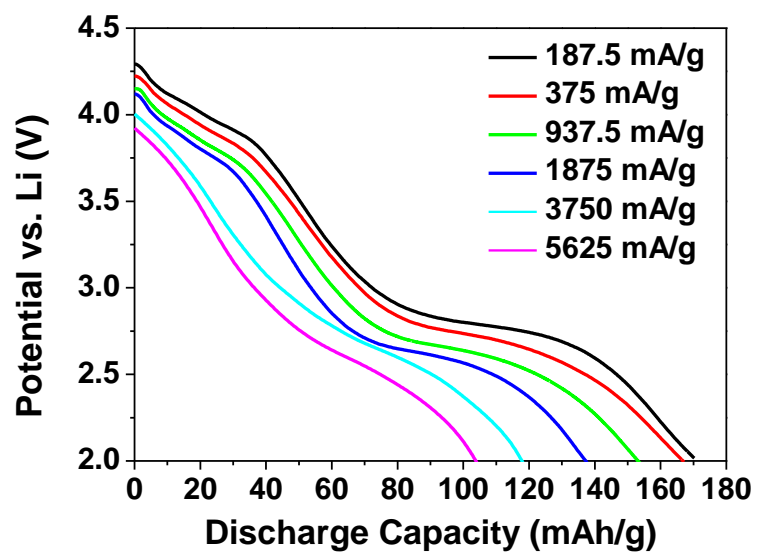

**Figure S6:** Discharge voltage profiles of LMO/G ( $I_{\text{LMO:G}} = 5.37$ ) electrode at various current densities.

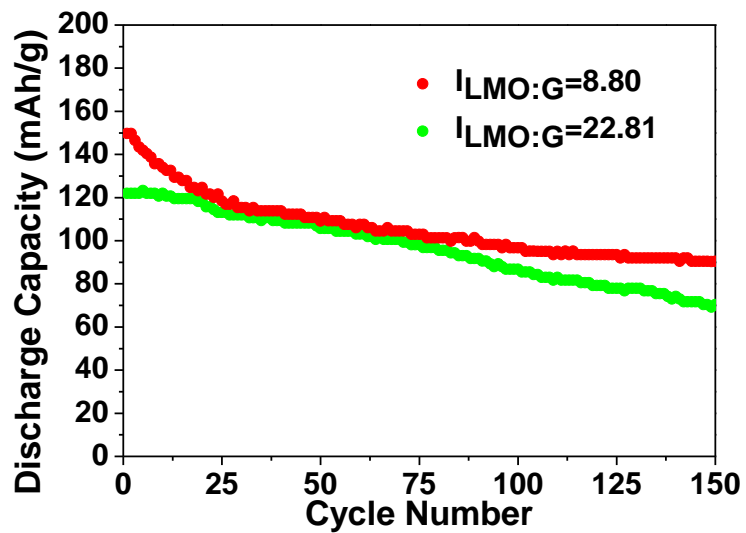

**Figure S7:** Cycling performance of  $\text{LiMn}_2\text{O}_4/\text{graphene}$  electrodes with different  $I_{\text{LMO:G}}$  values at the 38 C discharge rate and 19 C charge rate.



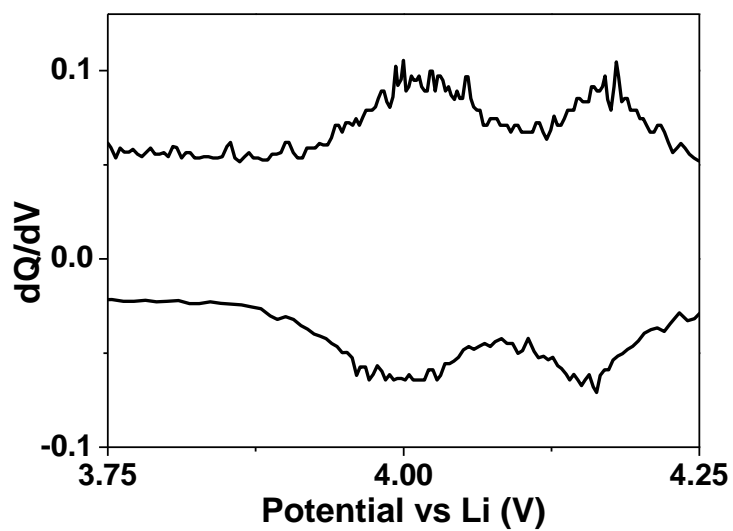

**Figure S8:** The curve of  $dQ/dV$  against potential (vs Li) of the second-cycle voltage profiles of  $\text{LiMn}_2\text{O}_4/\text{graphene}$  ( $I_{\text{LMO:G}} = 1.22$ ) between 3 and 4.5 V at 1.27 C.

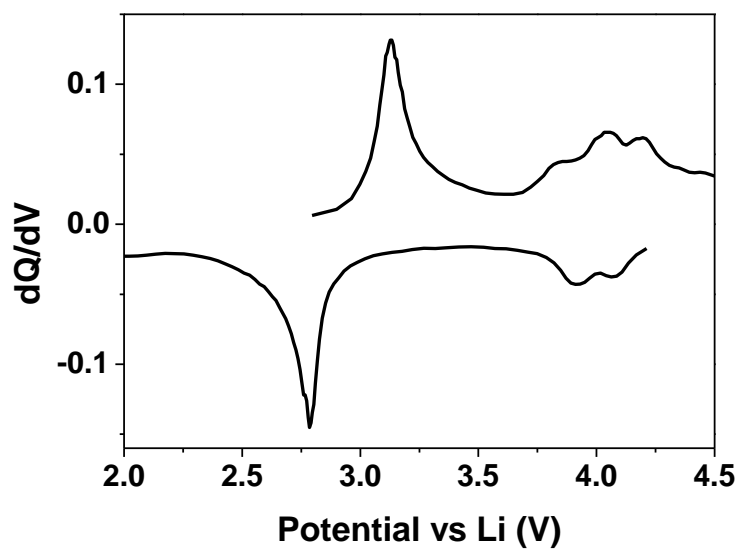

**Figure S9:** The curve of  $dQ/dV$  against potential (vs Li) of the second-cycle voltage profiles of  $\text{LiMn}_2\text{O}_4/\text{graphene}$  ( $I_{\text{LMO:G}} = 1.22$ ) between 2 and 4.5 V at 1.27 C.
